# Supplementary material
Source: publisher figshare collection journal article supplement (https://acs.figshare.com/ndownloader/files/3974770)

# checkCIF/PLATON report

You have not supplied any structure factors. As a result the full set of tests cannot be run.

THIS REPORT IS FOR GUIDANCE ONLY. IF USED AS PART OF A REVIEW PROCEDURE FOR PUBLICATION, IT SHOULD NOT REPLACE THE EXPERTISE OF AN EXPERIENCED CRYSTALLOGRAPHIC REFEREE.

No syntax errors found.      CIF dictionary      Interpreting this report

## Datablock: 1

---

|                 |                           |                        |             |
|-----------------|---------------------------|------------------------|-------------|
| Bond precision: | C-C = 0.0133 Å            | Wavelength=0.71073     |             |
| Cell:           | a=21.312(10)              | b=21.312(10)           | c=16.548(3) |
|                 | alpha=90                  | beta=90                | gamma=90    |
| Temperature:    | 113 K                     |                        |             |
|                 | Calculated                | Reported               |             |
| Volume          | 7516(7)                   | 7516(5)                |             |
| Space group     | I -4 2 d                  | I -4 2 d               |             |
| Hall group      | I -4 2bw                  | ?                      |             |
| Moiety formula  | C48 H32 Cl5 Mn6 N24, 4(O) | C48 H41 Cl5 Mn6 N24 O4 |             |
| Sum formula     | C48 H32 Cl5 Mn6 N24 O4    | C48 H41 Cl5 Mn6 N24 O4 |             |
| Mr              | 1515.87                   | 1524.89                |             |
| Dx,g cm-3       | 1.340                     | 1.340                  |             |
| Z               | 4                         | 4                      |             |
| Mu (mm-1)       | 1.207                     | 1.207                  |             |
| F000            | 3020.0                    | 3052.0                 |             |
| F000'           | 3031.65                   |                        |             |
| h,k,lmax        | 27,27,21                  | 27,27,21               |             |
| Nref            | 4465[ 2428]               | 4451                   |             |
| Tmin,Tmax       | 0.805,0.865               | 0.805,0.865            |             |
| Tmin'           | 0.786                     |                        |             |

Correction method= MULTI-SCAN

Data completeness= 1.83/1.00      Theta(max)= 27.810

R(reflections)= 0.0843( 3863)      wR2(reflections)= 0.2198( 4451)

S = 1.080      Npar= 192

---

The following ALERTS were generated. Each ALERT has the format  
**test-name\_ALERT\_alert-type\_alert-level.**  
Click on the hyperlinks for more details of the test.

---

## Alert level A

PLAT601\_ALERT\_2\_A Structure Contains Solvent Accessible VOIDS of . 2139 Ang3

---

## Alert level B

PLAT306\_ALERT\_2\_B Isolated Oxygen Atom (H-atoms Missing ?) ..... 01W

---

## Alert level C

ABSTY02\_ALERT\_1\_C An \_exptl\_absorpt\_correction\_type has been given without  
a literature citation. This should be contained in the  
\_exptl\_absorpt\_process\_details field.  
Absorption correction given as Multi-scan  
RINTA01\_ALERT\_3\_C The value of Rint is greater than 0.12  
Rint given 0.174  
STRVA01\_ALERT\_4\_C Flack test results are ambiguous.  
From the CIF: \_refine\_ls\_abs\_structure\_Flack 0.470  
From the CIF: \_refine\_ls\_abs\_structure\_Flack\_su 0.050  
PLAT020\_ALERT\_3\_C The value of Rint is greater than 0.12 ..... 0.174  
PLAT041\_ALERT\_1\_C Calc. and Reported SumFormula Strings Differ ? Check  
PLAT068\_ALERT\_1\_C Reported F000 Differs from Calcd (or Missing)... ? Check  
PLAT202\_ALERT\_3\_C Isotropic non-H Atoms in Anion/Solvent ..... 1  
PLAT341\_ALERT\_3\_C Low Bond Precision on C-C Bonds ..... 0.0133 Ang.

---

## Alert level G

FORMU01\_ALERT\_2\_G There is a discrepancy between the atom counts in the  
\_chemical\_formula\_sum and the formula from the \_atom\_site\* data.  
Atom count from \_chemical\_formula\_sum: C48 H41 Cl5 Mn6 N24 O4  
Atom count from the \_atom\_site data: C48 H32 Cl5 Mn6 N24 O4  
CELLZ01\_ALERT\_1\_G Difference between formula and atom\_site contents detected.  
CELLZ01\_ALERT\_1\_G WARNING: H atoms missing from atom site list. Is this intentional?  
From the CIF: \_cell\_formula\_units\_Z 4  
From the CIF: \_chemical\_formula\_sum C48 H41 Cl5 Mn6 N24 O4  
TEST: Compare cell contents of formula and atom\_site data

| atom | Z*formula | cif sites | diff  |
|------|-----------|-----------|-------|
| C    | 192.00    | 192.00    | 0.00  |
| H    | 164.00    | 128.00    | 36.00 |
| Cl   | 20.00     | 20.00     | 0.00  |
| Mn   | 24.00     | 24.00     | 0.00  |
| N    | 96.00     | 96.00     | 0.00  |
| O    | 16.00     | 16.00     | 0.00  |

PLAT004\_ALERT\_5\_G Info: Polymeric Structure Found with Dimension . 3  
PLAT005\_ALERT\_5\_G No \_iucr\_refine\_instructions\_details in the CIF ? Do !  
PLAT042\_ALERT\_1\_G Calc. and Reported MoietyFormula Strings Differ ? Check  
PLAT072\_ALERT\_2\_G SHELXL First Parameter in WGHT Unusually Large. 0.11  
PLAT093\_ALERT\_1\_G No su's on H-positions, refinement reported as . mixed  
PLAT152\_ALERT\_1\_G The Supplied and Calc. Volume s.u. Differ by ... 2 Units  
PLAT710\_ALERT\_4\_G Delete 1-2-3 or 2-3-4 Linear Torsion Angle ... # 5  
CL3 -MN1 -CL1 -MN1 107.70 0.70 1.555 1.555 1.555 4.555  
PLAT710\_ALERT\_4\_G Delete 1-2-3 or 2-3-4 Linear Torsion Angle ... # 10  
CL3 -MN1 -CL1 -MN1 -155.10 0.60 1.555 1.555 1.555 3.555  
PLAT710\_ALERT\_4\_G Delete 1-2-3 or 2-3-4 Linear Torsion Angle ... # 15  
CL3 -MN1 -CL1 -MN1 -57.80 0.60 1.555 1.555 1.555 2.555  
PLAT710\_ALERT\_4\_G Delete 1-2-3 or 2-3-4 Linear Torsion Angle ... # 20  
CL1 -MN1 -CL3 -MN2 -26.90 0.70 1.555 1.555 1.555 1.555  
PLAT710\_ALERT\_4\_G Delete 1-2-3 or 2-3-4 Linear Torsion Angle ... # 25  
CL3 -MN2 -CL3 -MN1 96.49 0.05 5.555 1.555 1.555 1.555  
PLAT710\_ALERT\_4\_G Delete 1-2-3 or 2-3-4 Linear Torsion Angle ... # 52  
N2 -MN2 -N5 -N4 17.00 4.00 5.555 1.555 1.555 1.555

```

PLAT710_ALERT_4_G Delete 1-2-3 or 2-3-4 Linear Torsion Angle ... #      57
      N2  -MN2 -N5  -C1   -154.00  3.00   5.555   1.555   1.555   1.555
PLAT710_ALERT_4_G Delete 1-2-3 or 2-3-4 Linear Torsion Angle ... #      84
      N5  -MN2 -N2  -N1    156.00  3.00   5.555   1.555   1.555   1.555
PLAT710_ALERT_4_G Delete 1-2-3 or 2-3-4 Linear Torsion Angle ... #      89
      N5  -MN2 -N2  -C12   -27.00  4.00   5.555   1.555   1.555   1.555
PLAT764_ALERT_4_G Overcomplete CIF Bond List Detected (Rep/Expd) .      1.28 Ratio

```

---

```

1 ALERT level A = Most likely a serious problem - resolve or explain
1 ALERT level B = A potentially serious problem, consider carefully
8 ALERT level C = Check. Ensure it is not caused by an omission or oversight
19 ALERT level G = General information/check it is not something unexpected

8 ALERT type 1 CIF construction/syntax error, inconsistent or missing data
4 ALERT type 2 Indicator that the structure model may be wrong or deficient
4 ALERT type 3 Indicator that the structure quality may be low
11 ALERT type 4 Improvement, methodology, query or suggestion
2 ALERT type 5 Informative message, check

```

---

It is advisable to attempt to resolve as many as possible of the alerts in all categories. Often the minor alerts point to easily fixed oversights, errors and omissions in your CIF or refinement strategy, so attention to these fine details can be worthwhile. In order to resolve some of the more serious problems it may be necessary to carry out additional measurements or structure refinements. However, the purpose of your study may justify the reported deviations and the more serious of these should normally be commented upon in the discussion or experimental section of a paper or in the "special\_details" fields of the CIF. checkCIF was carefully designed to identify outliers and unusual parameters, but every test has its limitations and alerts that are not important in a particular case may appear. Conversely, the absence of alerts does not guarantee there are no aspects of the results needing attention. It is up to the individual to critically assess their own results and, if necessary, seek expert advice.

### Publication of your CIF in IUCr journals

A basic structural check has been run on your CIF. These basic checks will be run on all CIFs submitted for publication in IUCr journals (*Acta Crystallographica*, *Journal of Applied Crystallography*, *Journal of Synchrotron Radiation*); however, if you intend to submit to *Acta Crystallographica Section C* or *E*, you should make sure that full publication checks are run on the final version of your CIF prior to submission.

### Publication of your CIF in other journals

Please refer to the *Notes for Authors* of the relevant journal for any special instructions relating to CIF submission.

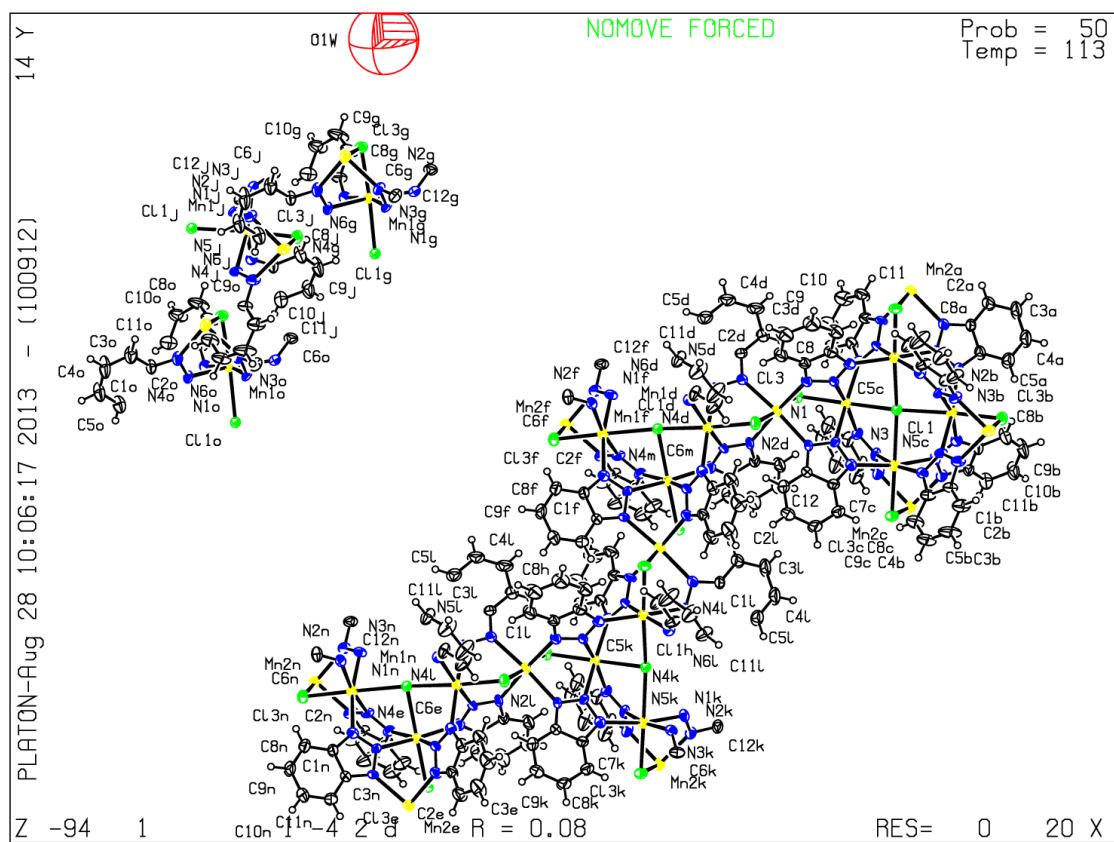

Supplement: Supplementary file 1 [file 3974770]
